# Supplementary material for: Causal contribution and dynamical encoding in the striatum during evidence accumulation
Source: eLife. 2018 Aug 24;7:e34929. doi: 10.7554/eLife.34929 (PMC6147735; doi:10.7554/eLife.34929)
Supplement: Supplementary file 1. — This table shows the values of the parameters that maximize the likelihood of the eight-parameter accumulator model for all no-perturbation sessions of each rat (four rats for pharmacological inactivation study, three rats for electrophysiology, and 13 rats for optogenetics). The 95% confidence range is shown in brackets underneath each estimate. [file elife-34929-supp1.xlsx]

## Sheet: Sheet1
Experiment	Data set	N trials	λ	𝝈a2	𝝈s2	B	𝝓	𝝉𝝓	Ϸ	𝜿
pharmacological inactivation	E005	2152	-1.2492	2.5728	18.4048	21.738	0	0.2084	0.2681	0.0647
			[-2.18 -0.22]	[1.78 3.72]	[11.08 29.81]	[B-∞]	[0.00 0.07]	[0.18 0.24]	[0.19 0.35]	[0.03 0.14]
pharmacological inactivation	T089	1154	-1.4685	5.4935	135.046	10.3601	0	0.0772	-0.5297	0.0621
			[-2.77 0.10]	[1.13 24.71]	[86.18 170.19]	[B-∞]	[0.00 0.90]	[0.06 0.10]	[-0.78 -0.28]	[0.01 0.25]
pharmacological inactivation	T097	3167	-1.6004	1.2017	185.519	12.8138	0.648	0.1828	0.0199	0.3926
			[-3.26 0.57]	[0.00 192.67]	[28.17 199.80]	[B-∞]	[0.49 0.80]	[0.12 0.27]	[-0.20 0.24]	[0.32 0.47]
pharmacological inactivation	T098	1867	-1.3545	21.1928	102.395	9.7197	0	0.0716	0.3719	0.1387
			[-2.72 0.27]	[11.80 36.62]	[57.38 146.46]	[B-∞]	[0.00 0.23]	[0.06 0.09]	[0.13 0.61]	[0.08 0.24]
electrophysiology	E021	4686	-1.0313	1.716	45.9864	11.9843	0.0665	0.1279	-0.0312	0.0554
			[-1.94 -0.05]	[0.84 3.48]	[39.05 53.77]	[B-∞]	[0.01 0.29]	[0.11 0.14]	[-0.10 0.04]	[0.03 0.09]
electrophysiology	T080	9647	1.9382	0.864	199.474	9.0713	0.2832	0.0076	0.3843	0.1495
			[0.90 2.82]	[0.00 180.02]	[145.23 200.00]	[B-∞]	[0.09 0.66]	[0.00 0.01]	[-0.06 0.83]	[0.13 0.17]
electrophysiology	T103	13845	0.819	81.524	199.957	14.5079	0.4658	0.0358	0.6487	0.1068
			[0.04 1.56]	[67.46 96.42]	[139.36 200.00]	[B-∞]	[0.39 0.54]	[0.03 0.04]	[0.34 0.96]	[0.08 0.13]
electrophysiology	physiology combined rat	28178	-1.4878	0.0006	199.952	8.5152	0.2782	0.0124	0.5056	0.0783
			[-1.65 -1.33]	[0.00 0.02]	[196.79 200.0]	[B-∞]	[0.28 0.28]	[0.01 0.02]	[0.43 0.59]	[0.07 0.09]
optogenetics	E006	43974	1.6707	0.0007	13.8083	6.3313	0.2455	0.5184	0.1314	0.1029
			[1.35 1.97]	[0.00 0.05]	[12.91 14.76]	[B-∞]	[0.22 0.27]	[0.50 0.54]	[0.12 0.15]	[0.09 0.11]
optogenetics	E007	46633	-0.6434	12.906	74.1312	7.8459	0.1365	0.0578	0.8733	0.1732
			[-0.95 -0.34]	[11.21 14.85]	[68.52 79.93]	[B-∞]	[0.10 0.19]	[0.05 0.06]	[0.80 0.95]	[0.16 0.18]
optogenetics	E008	41273	-0.9389	10.7968	66.3018	8.7389	0.1075	0.0649	-0.8659	0.2241
			[-1.19 -0.68]	[9.15 12.73]	[60.26 72.64]	[B-∞]	[0.07 0.17]	[0.06 0.07]	[-0.94 -0.79]	[0.21 0.24]
optogenetics	E044	26151	-3.7424	17.2054	12.6124	10.4512	0.1328	0.0706	-1.3123	0.0908
			[-3.88 -3.59]	[15.84 18.69]	[8.49 18.56]	[B-∞]	[0.11 0.17]	[0.07 0.07]	[-1.35 -1.27]	[0.08 0.10]
optogenetics	E048	69193	-1.6763	1.3561	90.8289	5.4627	0.1919	0.0819	-0.4835	0.0498
			[-1.86 -1.48]	[0.76 2.41]	[87.81 93.87]	[B-∞]	[0.17 0.22]	[0.08 0.09]	[-0.52 -0.45]	[0.04 0.06]
optogenetics	E049	56135	-1.4121	8.9391	105.301	8.2658	0.1457	0.0324	-1.2524	0.121
			[-1.63 -1.19]	[6.81 11.70]	[99.91 110.67]	[B-∞]	[0.10 0.21]	[0.03 0.03]	[-1.33 -1.17]	[0.11 0.13]
optogenetics	E054	12477	-2.7061	16.1601	147.595	18.7271	0.1956	0.0325	-0.113	0.1107
			[-3.15 -2.19]	[10.32 24.90]	[131.03 161.38]	[B-∞]	[0.11 0.32]	[0.03 0.04]	[-0.21 -0.02]	[0.09 0.14]
optogenetics	E064	26167	-2.8206	8.6722	155.828	6.9808	0.3234	0.0404	-0.7701	0.1001
			[-3.26 -2.31]	[5.19 14.33]	[145.29 164.85]	[B-∞]	[0.27 0.39]	[0.04 0.04]	[-0.87 -0.67]	[0.09 0.11]
optogenetics	E065	5849	-3.3379	102.135	14.9435	9.9398	0.3238	0.0507	-2.2155	0.0312
			[-3.69 -2.91]	[90.35 113.88]	[2.13 75.75]	[B-∞]	[0.26 0.40]	[0.05 0.06]	[-2.40 -2.02]	[0.01 0.07]
optogenetics	E067	23069	-2.219	3.0391	71.2253	13.2976	0.1765	0.0528	-0.3297	0.0509
			[-2.52 -1.90]	[1.89 4.88]	[66.94 75.64]	[B-∞]	[0.13 0.24]	[0.05 0.06]	[-0.39 -0.27]	[0.04 0.06]
optogenetics	E080	13840	1.2469	7.9249	38.276	10.9796	0.289	0.0748	0.6524	0.1694
			[0.60 1.86]	[6.28 9.98]	[32.18 45.23]	[B-∞]	[0.23 0.36]	[0.07 0.08]	[0.55 0.75]	[0.15 0.19]
optogenetics	J194	13300	-2.0007	36.6605	13.6415	12.22	0.163	0.0631	0.9202	0.1102
			[-2.36 -1.61]	[33.30 40.28]	[6.05 29.38]	[B-∞]	[0.12 0.22]	[0.06 0.07]	[0.83 1.01]	[0.09 0.13]
optogenetics	T107	32576	-2.5487	2.5423	118.734	7.0988	0.3036	0.0939	-0.3185	0.0531
			[-2.81 -2.27]	[1.33 4.84]	[112.34 124.98]	[B-∞]	[0.27 0.34]	[0.09 0.10]	[-0.36 -0.27]	[0.04 0.07]
