# Supplementary material for: Causal contribution and dynamical encoding in the striatum during evidence accumulation
Source: eLife. 2018 Aug 24;7:e34929. doi: 10.7554/eLife.34929 (PMC6147735; doi:10.7554/eLife.34929)
Supplement: Supplementary file 2. — Table 2 shows the values of the parameters that maximize the likelihood of the 11-parameter accumulator model for unilateral striatum inactivation data (n = 3528 trials) and unilateral striatum control data (n = 8349 trials). The 95% confidence range is shown in brackets underneath each estimate. The control corresponds to data taken on the no-infusion days immediately prior to the infusion day. Infusion sessions were spaced apart from each other by at least, and often more, non-infusion days. [file elife-34929-supp2.xlsx]

## Sheet: Sheet1
Best fit parameters (unilateral striatum inactivation data, n=4 rats)
Experiment	Data set	N trials	λ	𝝈a2	𝝈s,C2	𝝈s,I2	B	𝝓	𝝉𝝓	Ϸ	𝜿I	𝜿C	gw
pharmacological inactivation	uni-striatum control	8349	-1.4352	1.5048	65.9083	129.616	5.2642	0.137	0.1289	0.0097	0.2861	0.1996	0.4463
			[-2.34 -0.41]	[0.04 37.42]	[24.74 126.25]	[45.09 184.19]	[B-∞]	[0.03 0.48]	[0.07 0.23]	[-0.18 0.20]	[0.18 0.43]	[0.04 0.58]	[0.36 0.54]
pharmacological inactivation	uni-striatum	3528	-2.4453	13.3513	96.9242	129.607	12.7738	0	0.1156	0.25	0	0.5962	0.5366
			[-3.75 -0.47]	[0.03 194.41]	[1.04 198.82]	[5.35 198.39]	[B-∞]	[0.00 0.35]	[0.03 0.42]	[-0.47 0.96]	[0.00 0.14]	[0.14 0.93]	[0.35 0.71]
