# Supplementary material for: Causal contribution and dynamical encoding in the striatum during evidence accumulation
Source: eLife. 2018 Aug 24;7:e34929. doi: 10.7554/eLife.34929 (PMC6147735; doi:10.7554/eLife.34929)
Supplement: Supplementary file 3. — Table3 shows the values of the parameters which maximize the likelihood of the 8-parameter accumulator model for the bilateral striatum inactivation data (n = 2266 trials), the fit to the bilateral striatum control data (n = 3846 trials). 95% confidence range is shown in brackets underneath each estimate. Control corresponds to data taken on the no-infusion days immediately prior to the infusion day. Infusion sessions were spaced apart from each other by at least seven, and often more, non-infusion days. [file elife-34929-supp3.xlsx]

## Sheet: Sheet1
Best fit parameters (bilateral striatum inactivation data, n=3 rats)
Experiment	Data set	N trials	λ	𝝈a2	𝝈s2	B	𝝓	𝝉𝝓	Ϸ	𝜿
pharmacological inactivation	bi-striatum control	3846	-0.478	0.0017	9.9247	20.0297	0.5324	0.6227	-0.0836	0.3674
			[-2.13 1.28]	[0.00 20.94]	[1.25 60.36]	[B-∞]	[0.42 0.65]	[0.50 0.76]	[-0.14 -0.03]	[0.33 0.41]
pharmacological inactivation	bi-striatum	2266	-0.1724	83.3442	103.791	12.1274	0	0.0336	-0.6415	0.5116
			[-3.02 2.79]	[0.00 200.00]	[0.00 200.00]	[B-∞]	[0.00 0.92]	[0.00 0.47]	[-1.83 0.63]	[0.20 0.81]
