# Supplementary material for: Causal contribution and dynamical encoding in the striatum during evidence accumulation
Source: eLife. 2018 Aug 24;7:e34929. doi: 10.7554/eLife.34929 (PMC6147735; doi:10.7554/eLife.34929)
Supplement: Supplementary file 4. — Table 4 shows the values of the parameters that maximize the likelihood of the 11-parameter accumulator model for the unilateral FOF inactivation data (n = 3836 trials), and the fit to the unilateral FOF control data (n = 47,580, trials). The 95% confidence range is shown in brackets underneath each estimate. The control corresponds to data taken on the no-infusion days immediately prior to the infusion day. Infusion sessions were spaced apart from each other by at least seven, and often more, non-infusion days. [file elife-34929-supp4.xlsx]

## Sheet: Sheet1
Best fit parameters (unilateral FOF inactivation data, n=10 rats)
Experiment	Data set	N trials	λ	𝝈a2	𝝈s,C2	𝝈s,I2	B	𝝓	𝝉𝝓	Ϸ	𝜿I	𝜿C	gw
pharmacological inactivation	uniFOF control	47580	1.2545	0.0004	50.3075	70.0072	8.565	0.2266	0.1082	0.0363	0.1096	0.0895	0.4986
			[0.85 1.65]	[0.00 9.14]	[46.67 54.13]	[65.58 74.58]	[B-∞]	[0.19 0.27]	[0.10 0.11]	[0.01 0.06]	[0.10 0.12]	[0.08 0.10]	[0.49 0.50]
pharmacological inactivation	uniFOF	3836	-0.8908	0.7471	91.666	101.259	12.7395	0.2395	0.0693	0.3231	0.0414	0.9857	0.5471
			[-2.78 1.31]	[0.00 113.11]	[1.83 197.45]	[9.88 190.58]	[B-∞]	[0.07 0.60]	[0.02 0.96]	[-0.15 0.79]	[0.02 0.09]	[0.57 1.00]	[0.43 0.66]
