# Supplementary material for: Causal contribution and dynamical encoding in the striatum during evidence accumulation
Source: eLife. 2018 Aug 24;7:e34929. doi: 10.7554/eLife.34929 (PMC6147735; doi:10.7554/eLife.34929)
Supplement: Supplementary file 5. — Table 5 shows the values of the parameters that maximize the likelihood of the eight-parameter accumulator model for the unilateral striatum inactivation data (n = 1809 trials) and bilateral FOF control data (n = 1531 trials). The 95% confidence range is shown in brackets underneath each estimate. The control corresponds to data taken on the no-infusion days immediately prior to the infusion day. Infusion sessions were spaced apart from each other by at least seven, and often more, non-infusion days. [file elife-34929-supp5.xlsx]

## Sheet: Sheet1
Best fit parameters (bilateral FOF inactivation data, n=4 rats)
Experiment	Data set	N trials	λ	𝝈a2	𝝈s2	B	𝝓	𝝉𝝓	Ϸ	𝜿
pharmacological inactivation	biFOF control	1531	1.7413	0.046	9.1968	11.9263	0.3245	0.411	0.059	0.1576
			[-0.35 3.32]	[0.00 1.27]	[5.56 15.05]	[B-∞]	[0.20 0.48]	[0.33 0.50]	[-0.02 0.14]	[0.11 0.21]
pharmacological inactivation	biFOF	1809	-4.3498	7.4716	59.6308	5.2351	0.1278	0.1121	0.3562	0.2327
			[-4.95 2.72]	[0.53 72.14]	[6.02 170.67]	[B-∞]	[0.02 0.78]	[0.03 0.33]	[0.05 0.66]	[0.16 0.33]
