# Supplementary material for: Causal contribution and dynamical encoding in the striatum during evidence accumulation
Source: eLife. 2018 Aug 24;7:e34929. doi: 10.7554/eLife.34929 (PMC6147735; doi:10.7554/eLife.34929)
Supplement: Supplementary file 6. — Table 6 shows, for each parameter, the difference in Bayesian Information Criterion (BIC; Nagin, 1999) for the 11-parameter full model, minus the BIC for the model with that parameter removed. Positive numbers thus favor keeping the parameter. Calculations are for data for unilateral striatum inactivations (n = 3528 trials) and the corresponding control data (n = 8349 trials). [file elife-34929-supp6.xlsx]

## Sheet: Sheet1
BIC – 11p full model (unilateral inactivation)
Model	Infusion data	Control data	# of parameters
w/o 𝝀	0.19	0	10
w/o 𝝈a2	6.22	-0.8	10
w/o 𝝈s,C2, 𝝈s,I2	8.62	119.66	9
w/o B	-1	-1	10
w/o 𝝓	91.62	55.27	10
w/o Ϸ	0.73	-0.99	10
w/o gw	-0.61	1.83	10
w/o 𝜿c, 𝜿I	45.8	38.44	9
