# Supplementary material for: Causal contribution and dynamical encoding in the striatum during evidence accumulation
Source: eLife. 2018 Aug 24;7:e34929. doi: 10.7554/eLife.34929 (PMC6147735; doi:10.7554/eLife.34929)
Supplement: Supplementary file 7. — Table 7 uses the same conventions and shows, for each parameter, the difference in BICs for the eight-parameter full model minus a model with that parameter removed. Calculations are for data from bilateral striatum inactivations (n = 2266 trials) and for corresponding control data (n = 3846 trials). [file elife-34929-supp7.xlsx]

## Sheet: Sheet1
BIC – 8p full model (bilateral inactivation)
Model	Infusion data	Control data	# of parameters
w/o 𝝀	-1	-0.95	7
w/o 𝝈a2	2.91	-0.98	7
w/o 𝝈s2	-0.42	5.22	7
w/o B	-1	-1	7
w/o 𝝓	3.8	34.63	7
w/o Ϸ	-0.6	0.6	7
w/o 𝜿	28.75	116.73	7
w/o 𝝈a2, 𝝈s2	25.65	4.63	6
